# Supplementary material for: Water column distribution and carbon isotopic signal of cholesterol, brassicasterol and particulate organic carbon in the Atlantic sector of the Southern Ocean
Source: Copernicus journal article supplement (doi:10.5194/bg-10-2787-2013), 2013-04-29
Supplement: Supplementary file 1 [file Annex 1 Cavagna et al.xls]

## Sheet: Table 1
					Large particles POC, cholesterol and brassicasterol								Small particles POC, cholesterol and brassicasterol
	depth	density	δ13C-POC	POC	δ13C-cholesterol	cholesterol	δ13C-brassicasterol	brassicasterol	bra/cho		δ13C-POC	POC	δ13C-cholesterol	cholesterol	δ13C-brassicasterol	brassicasterol	bra/cho
	(m)	(g L-1)	(‰)	(µg L-1)	(‰)	(ng L-1)	(‰)	(ng L-1)	(no unit)		(‰)	(µg L-1)	(‰)	(ng L-1)	(‰)	(ng L-1)	(no unit)
station S1
36°31'S	50	1025.9	-20.8	1.57548	-27.2 ± 1.1	1.13699	-28.0 ± 1.2	1.16519	1		-20.8735	11.7772	-27.6 ± 1.2	37.5929	-25.8 ± 1.5	65.287	1.73669
13°07E	75	1026.4	-21.7005	0.961738	-27.2 ± 1.1	1.13481	-	-	-		N.D.	N.D.	-25.0 ± 1.1	24.7824	-27.7 ± 1.2	42.1393	1.70037
	125	1026.9	-21.4915	0.206775	-29.1 ± 1.2	1.20717	-31.4 ± 1.3	1.31264	1.1		-22.5249	11.3356	-26.6 ± 1.1	17.979	-26.7 ± 1.1	17.3358	0.96423
	175	1027.4	-23.4552	0.0452348	N.D.	N.D.	N.D.	N.D.	N.D.		N.D.	N.D.	N.D.	N.D.	N.D.	N.D.	N.D.
	250	1027.7	-22.5914	0.123567	N.D.	N.D.	N.D.	N.D.	N.D.		-21.0598	2.88307	-22.6 ± 1.1	9.79101	-25.2 ± 1.1	6.52865	0.666801
	500	1029.2	-18.1019	0.079555	N.D.	N.D.	N.D.	N.D.	N.D.		-21.5791	2.09729	N.D.	N.D.	N.D.	N.D.	N.D.
	750	1030.5	-19.7308	0.116716	N.D.	N.D.	N.D.	N.D.	N.D.		-21.8437	2.05854	-23.7 ± 1.1	7.12112	-	-	-
	1250	1033.3	N.D.	N.D.	N.D.	N.D.	N.D.	N.D.	N.D.		-21.1509	1.0006	-21.5 ± 1.1	3.02568	-	-	-
	2750	1040.3	-15.6956	0.0207089	N.D.	N.D.	N.D.	N.D.	N.D.		-26.7629	2.60301	-20.9 ± 1.1	2.33205	-	-	-
	4700	1049	-25.2719	0.098021	N.D.	N.D.	N.D.	N.D.	N.D.		-26.3749	3.50656	-21.4 ± 1.1	2.71468	-	-	-
station S2
42°28'S	30	1026.2	-19.7099	4.57472	-30.2 ± 1.3	1.25485	-29.9 ± 1.2	1.22465	1		-21.5524	38.6236	-26.8 ± 1.1	33.8147	-27.4 ± 1.1	46.7693	1.3831
08°55'S	75	1026.7	-20.5002	1.5884	-29.1 ± 1.2	1.21004	-29.0 ± 1.2	1.20481	1		-22.324	21.198	-27.0 ± 1.1	24.5102	-26.6 ± 1.1	30.1421	1.22978
	130	1027.2	-21.6909	0.264852	-31.8 ± 1.3	1.32774	-	-	-		-22.3336	5.3391	-29.4 ± 1.2	8.75384	-29.0 ± 1.2	9.261	1.05794
	250	1028	-21.9416	0.365891	N.D.	N.D.	N.D.	N.D.	N.D.		-23.2041	4.3151	-28.9 ± 1.2	8.08294	-30.1 ± 1.3	6.9358	0.858079
	590	1029.8	-21.5633	0.0492396	N.D.	N.D.	N.D.	N.D.	N.D.		-24.7222	1.21208	-31.0 ± 1.3	5.08635	-30.3 ± 1.3	3.71435	0.730258
	608	1030.1	-21.7821	0.233845	N.D.	N.D.	N.D.	N.D.	N.D.		-24.822	2.72944	-30.3 ± 1.3	6.11142	-28.1 ± 1.2	3.36087	0.549934
	1450	1034.4	-16.8735	0.031684	N.D.	N.D.	N.D.	N.D.	N.D.		-21.9335	1.17709	-23.7 ± 1.1	1.29651	-	-	-
	2900	1041	-25.1343	0.105034	N.D.	N.D.	N.D.	N.D.	N.D.		-23.1462	0.742316	-20.3 ± 1.1	0.747616	-	-	-
	2910	1041.1	-19.4124	0.0230609	N.D.	N.D.	N.D.	N.D.	N.D.		-23.5805	0.608972	-23.9 ± 1.1	0.767272	-	-	-
	3940	1045.7	-26.0498	0.116283	N.D.	N.D.	N.D.	N.D.	N.D.		-21.9119	0.827743	-18.2 ± 1.1	0.665921	-	-	-
station S3
47°33'S	20	1026.6	-25.4362	2.92291	N.D.	N.D.	N.D.	N.D.	N.D.		-25.0215	39.9349	-37.1 ± 1.6	7.40301	-36.9 ± 1.6	38.9377	5.25971
04°22'S	50	1026.7	-25.1851	1.07911	N.D.	N.D.	N.D.	N.D.	N.D.		-24.8817	39.6062	-31.5 ± 1.3	17.2838	-34.9 ± 1.5	37.8248	2.18846
	150	1027.6	-24.8794	0.74079	N.D.	N.D.	N.D.	N.D.	N.D.		-23.8425	5.03993	-30.0 ± 1.2	5.003	-31.2 ± 1.3	7.76956	1.55298
	230	1028.2	-24.5063	0.104269	N.D.	N.D.	N.D.	N.D.	N.D.		-22.8361	3.88988	-30.0 ± 1.2	3.94321	-31.2 ± 1.3	5.76042	1.46084
	450	1029.5	-23.5253	0.888255	N.D.	N.D.	N.D.	N.D.	N.D.		-23.5279	2.3958	-30.6 ± 1.2	3.34056	-30.2 ± 1.3	3.74619	1.12143
	550	1030	-23.1634	0.895513	N.D.	N.D.	N.D.	N.D.	N.D.		-23.8464	2.79797	-30.4 ± 1.2	6.00462	-30.7 ± 1.3	4.42712	0.737285
	1060	1032.5	-23.0254	0.120381	N.D.	N.D.	N.D.	N.D.	N.D.		-24.9246	2.0998	-29.7 ± 1.2	2.92075	-31.1 ± 1.3	1.64076	0.561758
	1088	1032.6	-23.944	0.250427	N.D.	N.D.	N.D.	N.D.	N.D.		-24.0221	1.07911	-27.3 ± 1.1	1.75433	-30.0 ± 1.3	1.46378	0.834379
	2023	1037.2	-20.7821	0.0504054	N.D.	N.D.	N.D.	N.D.	N.D.		-24.3385	1.06539	-29.7 ± 1.2	0.949976	-29.3 ± 1.2	0.695279	0.731891
	2043	1037.3	-22.9446	0.0561649	N.D.	N.D.	N.D.	N.D.	N.D.		-24.3909	1.15663	-27.8 ± 1.1	0.960274	-29.2 ± 1.2	0.919567	0.95761
	4320	1047.4	-22.6822	0.0595633	N.D.	N.D.	N.D.	N.D.	N.D.		-24.5813	0.895849	-26.4 ± 1.1	0.305434	-30.9 ± 1.3	0.310568	1.01681
station S4
51°52'S	40	1027	-23.2784	1.29565	-37.1 ± 1.6	1.5982	-49.0 ± 1.3	1.31073	0.8		N.D.	N.D.	N.D.	N.D.	N.D.	N.D.	N.D.
00°00'E	80	1027.3	-24.3352	3.08664	-36.1 ± 1.5	1.53068	-45.3 ± 2.1	2.06269	1.3		-26.4586	17.7469	-34.3 ± 1.4	20.0982	-35.8 ± 1.5	32.8345	1.63371
	100	1027.4	-24.8696	2.30181	-38.5 ± 1.7	1.68869	-46.7 ± 2.2	2.14801	1.3		-26.3787	15.6653	-35.5 ± 1.5	12.9905	-37.0 ± 1.6	32.6511	2.51346
	125	1027.6	-25.0345	1.08356	-33.8 ± 1.4	1.39519	-37.3 ± 1.6	1.61059	1.2		-26.2033	14.2437	-33.8 ± 1.4	15.5506	-35.70 ± 1.5	29.562	1.90101
	165	1028.1	-25.6317	0.448072	N.D.	N.D.	N.D.	N.D.	N.D.		-26.4344	5.55844	-32.8 ± 1.3	6.1517	-40.0 ± 1.8	9.65686	1.56979
	400	1029.5	-26.0674	0.112927	N.D.	N.D.	N.D.	N.D.	N.D.		-26.716	3.50798	-34.3 ± 1.4	2.93648	-37.5 ± 1.6	3.43872	1.17103
	749	1031.2	N.D.	N.D.	N.D.	N.D.	N.D.	N.D.	N.D.		-27.1521	2.77513	-32.7 ± 1.3	5.88616	-36.3 ± 1.6	2.17495	0.369503
	1108	1033	-24.581	0.0718218	N.D.	N.D.	N.D.	N.D.	N.D.		-26.6626	2.90735	-32.8 ± 1.3	1.10865	-32.8 ± 1.4	1.30392	1.17614
	2468	1039.2	-23.4955	0.0474338	N.D.	N.D.	N.D.	N.D.	N.D.		-27.1814	2.7945	-30.1 ± 1.2	0.974961	-33.9 ± 1.4	1.13202	1.16109
station S5
57°33'S	50	1027.6	-29.0862	6.56657	-37.0 ± 1.6	1.58689	-41.9 ± 1.9	1.86885	1.2		-28.8595	18.9235	-37.0 ± 1.6	15.8177	-40.6 ± 1.8	28.7245	1.81598
00°03'E	90	1028	-29.7351	2.47718	-42.4 ± 2.0	1.94849	-44.8 ± 2.0	2.03219	1		-28.5995	13.9035	-36.8 ± 1.6	15.9659	-40.9 ± 1.8	25.6265	1.60507
	125	1028.2	-30.2796	1.70717	N.D.	N.D.	N.D.	N.D.	N.D.		-28.9026	8.38752	-36.8 ± 1.6	9.83909	-39.8 ± 1.8	14.7145	1.49551
	300	1029.2	-27.9575	0.0373824	N.D.	N.D.	N.D.	N.D.	N.D.		-28.7416	3.16998	-34.2 ± 1.4	6.11927	-37.1 ± 1.6	10.5426	1.72286
	500	1030.2	-25.4004	0.0852463	N.D.	N.D.	N.D.	N.D.	N.D.		-28.1859	1.85199	-32.9 ± 1.3	5.57892	-37.3 ± 1.6	4.61876	0.827894
	650	1030.8	-26.4135	0.149386	N.D.	N.D.	N.D.	N.D.	N.D.		-28.523	4.60859	-33.5 ± 1.4	3.23804	-37.7 ± 1.6	3.25905	1.00649
	1500	1034.9	-22.907	0.0994527	N.D.	N.D.	N.D.	N.D.	N.D.		-26.8007	0.770842	N.D.	N.D.	-35.1 ± 1.5	0.818474	N.D.
	2500	1039.4	-24.3352	0.0236756	N.D.	N.D.	N.D.	N.D.	N.D.		-27.4075	1.49485	-30.7 ± 1.2	0.790657	-34.9 ± 1.5	0.741117	0.937343
	3884	1045.6	-22.8308	0.0296185	N.D.	N.D.	N.D.	N.D.	N.D.		-27.8889	2.69314	-30.4 ± 1.2	0.574854	-33.5 ± 1.4	0.622213	1.08238
	3894	1045.6	-23.8017	0.0373824	N.D.	N.D.	N.D.	N.D.	N.D.		-26.3401	0.54937	-31.2 ± 1.2	0.536652	-35.6 ± 1.5	0.667664	1.24413
