# Supplementary material for: Water column distribution and carbon isotopic signal of cholesterol, brassicasterol and particulate organic carbon in the Atlantic sector of the Southern Ocean
Source: Copernicus journal article supplement (doi:10.5194/bg-10-2787-2013), 2013-04-29
Supplement: Supplementary file 1 [file Annex 2 Cavagna et al.pdf › Annex 2 Cavagna et al.pdf]

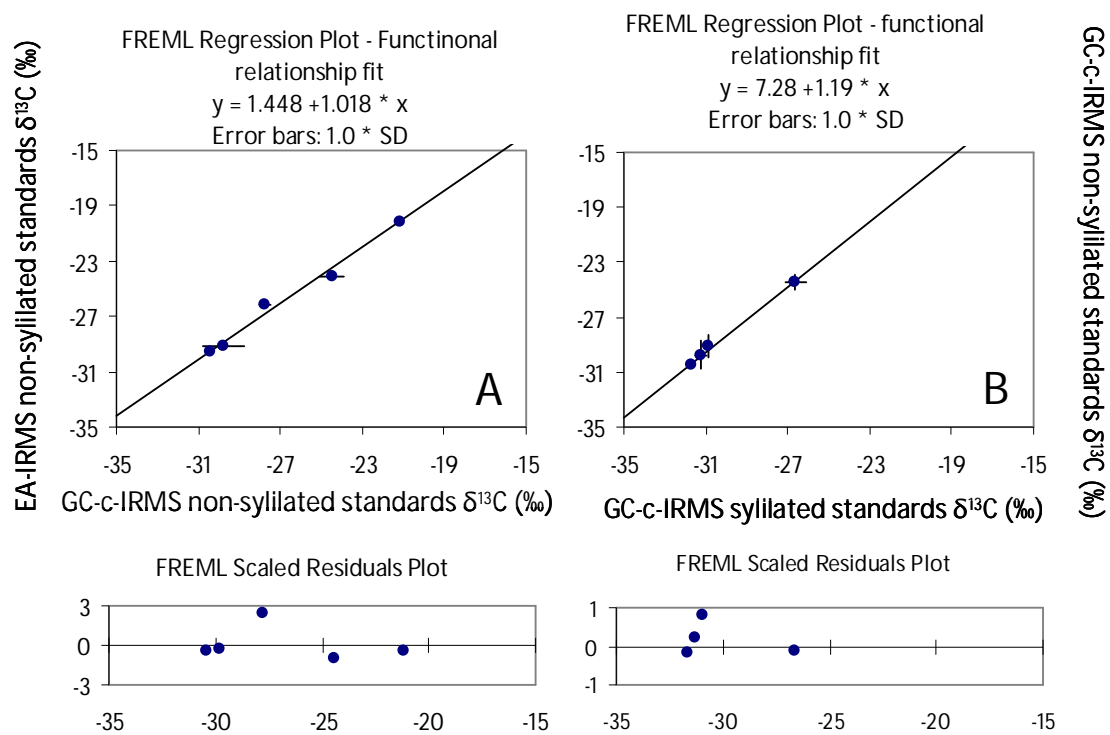

Annex 2. Standard mix based functional relationship fit for accuracy (A) GC-c-IRMS vs. EA-IRMS non-syllated standards, (B) syllation vs. non-syllation; and their respective FREML scaled residuals plot.
